# Supplementary material for: Microbial Selection and Survival in Subseafloor Sediment
Source: PubMed Central journal article supplement (PMC6527604; doi:10.3389/fmicb.2019.00956), 2019-05-14
Supplement: Data_Sheet_1.pdf [file Data_Sheet_1.pdf]

## *Supplementary Material*

### Article Title

**John B. Kirkpatrick\*, Emily A. Walsh, Steven D'Hondt**

\* **Correspondence:** Corresponding Author: john.b.kirkpatrick@gmail.com

#### 1 Supplementary Figures and Tables

**Supplementary Table 1.** Abundant archaeal sequence types, in rank order, for Bering Sea (BS) Site U1343 and Bay of Bengal Site NGHP-14 (BB). Taxonomic assignment, based on SILVA release 132, is listed down to genus level. Identical taxonomic assignments at a given site indicates similar taxonomy for unique, non-identical OTUs. For archaea, asterisk (\*) indicates highest taxonomic level where nomenclature uncertainty or Candidatus status may apply; this is unrelated to certainty of taxonomic assignment.

| <b>OTU ID<br/>(rank order)</b> | <b>Location</b> | <b>Taxonomic assignment</b>                                                      | <b>Location</b> | <b>Taxonomic assignment</b>                                                                               |
|--------------------------------|-----------------|----------------------------------------------------------------------------------|-----------------|-----------------------------------------------------------------------------------------------------------|
| 1                              | BS              | Crenarchaeota; *Bathyarchaeia;<br>Bathyarchaeia; Bathyarchaeia;<br>Bathyarchaeia | BB              | Thaumarchaeota;<br>Nitrososphaeria;<br>Nitrosopumilales;<br>Nitrosopumilaceae;<br><i>Nitrosopumilus</i> ; |
| 2                              | BS              | Crenarchaeota; *Bathyarchaeia;<br>Bathyarchaeia; Bathyarchaeia;<br>Bathyarchaeia | BB              | Nanoarchaeaeota;<br>*Nanohaloarchaeia;<br>Aenigmarchaeales;<br>Aenigmarchaeales;<br>Aenigmarchaeales      |
| 3                              | BS              | Crenarchaeota; *Bathyarchaeia;<br>Bathyarchaeia; Bathyarchaeia;<br>Bathyarchaeia | BB              | Crenarchaeota; *Bathyarchaeia;<br>Bathyarchaeia; Bathyarchaeia;<br>Bathyarchaeia                          |
| 4                              | BS              | Crenarchaeota; *Bathyarchaeia;<br>Bathyarchaeia; Bathyarchaeia;<br>Bathyarchaeia | BB              | Crenarchaeota; *Bathyarchaeia;<br>Bathyarchaeia; Bathyarchaeia;<br>Bathyarchaeia                          |

|    |    |                                                                                                         |    |                                                                                                                      |
|----|----|---------------------------------------------------------------------------------------------------------|----|----------------------------------------------------------------------------------------------------------------------|
| 5  | BS | Euryarchaeota; Methanomicrobia;<br>Methanosarcinales;<br>Methanosarcinaceae;<br><i>Methanococoides</i>  | BB | *Hydrothermarchaeota;<br>Hydrothermarchaeota;<br>Hydrothermarchaeota;<br>Hydrothermarchaeota;<br>Hydrothermarchaeota |
| 6  | BS | Crenarchaeota; *Bathyarchaeia;<br>Bathyarchaeia; Bathyarchaeia;<br>Bathyarchaeia                        | BB | Euryarchaeota; Methanomicrobia;<br>Methanocellales;<br>Methanocellaceae; <i>Methanocella</i>                         |
| 7  | BS | Crenarchaeota; Thermoprotei;<br>*uncultured; uncultured;<br>uncultured                                  | BB | Euryarchaeota; Thermococci;<br>*Methanofastidiosales;<br>uncultured; uncultured                                      |
| 8  | BS | Crenarchaeota; *Bathyarchaeia;<br>Bathyarchaeia; Bathyarchaeia;<br>Bathyarchaeia                        | BB | Euryarchaeota; Methanobacteria;<br>Methanobacteriales;<br>Methanobacteriaceae;<br><i>Methanobacterium</i>            |
| 9  | BS | Crenarchaeota; *Bathyarchaeia;<br>Bathyarchaeia; Bathyarchaeia;<br>Bathyarchaeia                        | BB | *Asgardaeota; Lokiarchaeia;<br>Lokiarchaeia; Lokiarchaeia;<br>Lokiarchaeia                                           |
| 10 | BS | Thaumarchaeota;<br>Nitrososphaeria;<br>Nitrosopumilales;<br>Nitrosopumilaceae;<br><i>Nitrosopumilus</i> | BB | Nanoarchaeaeota;<br>*Woeseearchaeia; Woeseearchaeia;<br>Woeseearchaeia; Woeseearchaeia                               |
| 11 | BS | Crenarchaeota; *Bathyarchaeia;<br>Bathyarchaeia; Bathyarchaeia;<br>Bathyarchaeia                        | BB | Crenarchaeota; Thermoprotei;<br>*uncultured; uncultured;<br>uncultured                                               |

**Supplementary Table 2.** Abundant bacterial sequence types, in rank order, for Bering Sea Site U1343 (BS) and Bay of Bengal Site NGHP-14 (BB). Taxonomic assignment, based on SILVA release 132, is listed down to genus level. Identical taxonomic assignments at a given site indicates similar taxonomy for unique, non-identical OTUs.

| <b>OTU ID<br/>(rank<br/>order)</b> | <b>Location</b> | <b>Taxonomic assignment</b>                                                                            | <b>Location</b> | <b>Taxonomic assignment</b>                                                                               |
|------------------------------------|-----------------|--------------------------------------------------------------------------------------------------------|-----------------|-----------------------------------------------------------------------------------------------------------|
| 1                                  | BS              | Candidatus Atribacteria;<br>JS1; JS1; JS1; JS1                                                         | BB              | Chloroflexi; Anaerolineae;<br>uncultured; uncultured;<br>uncultured                                       |
| 2                                  | BS              | Acidobacteria; Candidatus<br>Aminicenantia;<br>Aminicenantales;<br>Aminicenantales;<br>Aminicenantales | BB              | Proteobacteria;<br>Deltaproteobacteria;<br>Sva0485; Sva0485; Sva0485                                      |
| 3                                  | BS              | Proteobacteria;<br>Alphaproteobacteria;<br>Rhizobiales;<br>Hyphomicrobiaceae;<br>uncultured            | BB              | Patescibacteria; Candidatus<br>Microgenomatia;<br>Woesebacteria;<br>Woesebacteria;<br>“Woesebacteria”     |
| 4                                  | BS              | Chloroflexi;<br>Dehalococcoidia; S085;<br>S085; S085                                                   | BB              | Firmicutes; Bacilli;<br>Bacillales; Bacillaceae;<br><i>Bacillus</i>                                       |
| 5                                  | BS              | Candidatus Aerophobetes;<br>Aerophobetes;<br>Aerophobetes;<br>Aerophobetes; Aerophobetes               | BB              | Chloroflexi;<br>Dehalococcoidia; DscP2;<br>DscP2; DscP2                                                   |
| 6                                  | BS              | Chloroflexi; Anaerolineae;<br>Thermoflexales;<br>Thermoflexaceae;<br><i>Thermoflexus</i>               | BB              | Proteobacteria;<br>Deltaproteobacteria;<br>Desulfarculales;<br>Desulfarculaceae;<br><i>Desulfatiglans</i> |
| 7                                  | BS              | Chloroflexi; Anaerolineae;<br>Anaerolineales;<br>Anaerolineaceae; uncultured                           | BB              | Actinobacteria;<br>Thermoleophilia;<br>Solirubrobacterales; 67-14;<br>67-14                               |
| 8                                  | BS              | Chloroflexi; Anaerolineae;<br>Anaerolineales;<br>Anaerolineaceae; uncultured                           | BB              | Firmicutes; Clostridia;<br>Clostridiales;                                                                 |

|    |    |                                                                                                           |    |                                                                                                           |
|----|----|-----------------------------------------------------------------------------------------------------------|----|-----------------------------------------------------------------------------------------------------------|
|    |    |                                                                                                           |    | Ruminococcaceae;<br>unclassified                                                                          |
| 9  | BS | Chloroflexi; Anaerolineae;<br>Anaerolineales;<br>Anaerolineaceae; uncultured                              | BB | Candidatus Atribacteria; JS1;<br>JS1; JS1; JS1                                                            |
| 10 | BS | Proteobacteria;<br>Deltaproteobacteria;<br>Desulfarculales;<br>Desulfarculaceae;<br><i>Desulfatiglans</i> | BB | Proteobacteria;<br>Alphaproteobacteria;<br>Rhizobiales;<br>Beijerinckiaceae; <i>Microvirga</i>            |
| 11 | BS | Chloroflexi;<br>Dehalococcoidia;<br>S085;S085; S085                                                       | BB | Actinobacteria;<br>Thermoleophilia;<br>Solirubrobacterales; 67-14;<br>67-14                               |
| 12 | BS | Proteobacteria;<br>Deltaproteobacteria;<br>Desulfobacteriales;<br>Desulfobacteraceae; SEEP-<br>SRB        | BB | Proteobacteria;<br>Deltaproteobacteria;<br>Desulfarculales;<br>Desulfarculaceae;<br><i>Desulfatiglans</i> |
| 13 | BS | Chloroflexi;<br>Dehalococcoidia; DscP2;<br>DscP2; DscP2                                                   | BB | Actinobacteria;<br>Thermoleophilia; Gaiellales;<br>uncultured; uncultured                                 |
| 14 | BS | Aerophobetes;<br>Aerophobetes;<br>Aerophobetes;<br>Aerophobetes;<br>Aerophobetes;                         | BB | Planctomycetes;<br>Phycisphaerae; MSBL9;<br>SG8-4; SG8-4                                                  |
| 15 | BS |                                                                                                           | BB | Actinobacteria;<br>Actinobacteria;<br>Streptomycetales;<br>Streptomycetaceae;<br><i>Streptomyces</i>      |
| 16 |    |                                                                                                           | BB | Actinobacteria;<br>Actinobacteria;                                                                        |

|    |  |  |    |                                                                                                    |
|----|--|--|----|----------------------------------------------------------------------------------------------------|
|    |  |  |    | Propionibacteriales;<br>Propionibacteriaceae;<br><i>Microbunus</i>                                 |
| 17 |  |  | BB | Proteobacteria;<br>Deltaproteobacteria;<br>Desulfobacterales;<br>Desulfobacteraceae; SEEP-<br>SRB1 |
| 18 |  |  | BB | Spirochaetes; Spirochaetia;<br>Spirochaetales;<br>Spirochaetaceae; uncultured                      |

### 1.1 Supplementary Figures

**Supplementary Figure 1.** Principal coordinates analysis (PCoA) for archaea showing the similarity of samples from the two different sites and different depths. Similarity was determined by abundance-weighted metrics (Bray-Curtis). (A) PCoA plot. The loading explained by the two axes is shown (23% for x, 17% for y). Symbol size represents sample depth. (B) Secondary axis ordination (18% of variance) versus sample depth, with an exponential fit. Open symbols with solid outlines indicate Bering Sea samples. Gray symbols with dashed outlines indicate Bay of Bengal samples. (C) Same as (B) but the second PCoA axis (15% of variance).
